# Supplementary material
Source: PubMed Central journal article supplement (PMC3409453)
Supplement: Supp_Data.pdf [file Supp_Data.pdf]

## Supplementary Data

SUPPLEMENTARY TABLE S1. PATIENT DISPOSITION (N=46)

|                    | Total | Group I        | Group II | Group III      |
|--------------------|-------|----------------|----------|----------------|
| Enrolled           | 46    | 20             | 20       | 6              |
| Completed          | 38    | 14             | 20       | 4              |
| Withdrawn          | 8     | 6              | 0        | 2              |
| Protocol violation | 2     | 1 <sup>a</sup> |          | 1 <sup>b</sup> |
| Consent withdrawn  | 6     | 5              |          | 1              |

<sup>a</sup>One patient was unable to be consistent in carbohydrate counting techniques.

<sup>b</sup>One patient was withdrawn due to not meeting glycosylated hemoglobin inclusion criteria.

SUPPLEMENTARY TABLE S2. INSULIN DOSE AND CHANGE IN EFFICACY VARIABLES

|                                             | Total (n=46)                                       | Group I (n=20)                      | Group II (n=20)                                    | Group III (n=6)                        |
|---------------------------------------------|----------------------------------------------------|-------------------------------------|----------------------------------------------------|----------------------------------------|
| Weekly mean blood glucose (mg/dL) [mmol/L]  |                                                    |                                     |                                                    |                                        |
| Week 4                                      | 172.4 (35.0)<br>[9.6 (1.9)]                        | 176.9 (28.3)<br>[9.8 (1.6)]         | 164.9 (37.6)<br>[9.2 (2)]                          | 190.8 (47.0)<br>[10.6 (2.6)]           |
| Week 16                                     | 163.3 (35.1)<br>[9 (1.9)] <sup>†</sup>             | 173.2 (26.9)<br>[9.6 (1.5)]         | 156.8 (40.5)<br>[8.7 (2.2)]                        | 161.3(30.0)<br>[8.9(1.7)] <sup>†</sup> |
| HbA1c (%)                                   |                                                    |                                     |                                                    |                                        |
| Baseline                                    | 8.9 (1.1)                                          | 8.9 (0.9)                           | 8.8 (0.8)                                          | 9.0 (2.1)                              |
| Week 4                                      | 8.4 (0.8)*                                         | 8.4 (0.6)*                          | 8.3 (0.8)*                                         | 9.1 (1.5)                              |
| Week 16                                     | 7.9 (0.9)* <sup>†</sup>                            | 8.3 (0.8)                           | 7.7 (0.9)* <sup>†</sup>                            | 7.8 (1.4)                              |
| Fructosamine (μM)                           |                                                    |                                     |                                                    |                                        |
| Baseline                                    | 330 (65)                                           | 377 (59)                            | 295 (44)                                           | 289 (41)                               |
| Week 4                                      | 303 (53)*                                          | 349 (46)*                           | 273 (30)*                                          | 270 (33)                               |
| Week 16                                     | 293 (64)*                                          | 355 (46)*                           | 263 (45)*                                          | 233 (25) <sup>†</sup>                  |
| Daily insulin dose (units)                  |                                                    |                                     |                                                    |                                        |
| Baseline                                    | 80.8 (42.2)<br>[0.7 (0.4) units/kg]                | 54.4 (23.3)<br>[0.6 (0.2) units/kg] | 106.7 (40.7)<br>[0.9 (0.3) units/kg]               | 97.1 (44.9)<br>[0.8 (0.4) units/kg]    |
| Week 4                                      | 81.9 (42.5)<br>[0.7 (0.6) units/kg]                | 52.9 (21.7)<br>[0.6 (0.2) units/kg] | 108.7 (40.0)<br>[0.9 (0.3) units/kg]               | 80.8 (29.0)<br>[0.7 (0.2) units/kg]    |
| Week 16                                     | 112.4 (69.4)<br>[1.0 (0.4) units/kg] <sup>*†</sup> | 51.7 (21.7)<br>[0.5 (0.2) units/kg] | 150.7 (65.8)<br>[1.2 (0.5) units/kg] <sup>*†</sup> | 133.0 (48.6)<br>[1.1 (0.4) units/kg]   |
| Basal/bolus insulin ratio (Groups I and II) |                                                    |                                     |                                                    |                                        |
| Baseline                                    | 0.49 (0.1)                                         | 0.51 (0.1)                          | 0.48 (0.1)                                         |                                        |
| Week 4                                      | 0.5 (0.1)                                          | 0.51 (0.1)                          | 0.5 (0.1)                                          |                                        |
| Week 16                                     | 0.45 (0.1) <sup>†</sup>                            | 0.46 (0.1)                          | 0.44 (0.1) <sup>†</sup>                            |                                        |

Data are mean (SD) values.

\*P<0.05 compared with baseline; <sup>†</sup>P<0.05 compared with Week 4.

HbA1c, glycosylated hemoglobin.

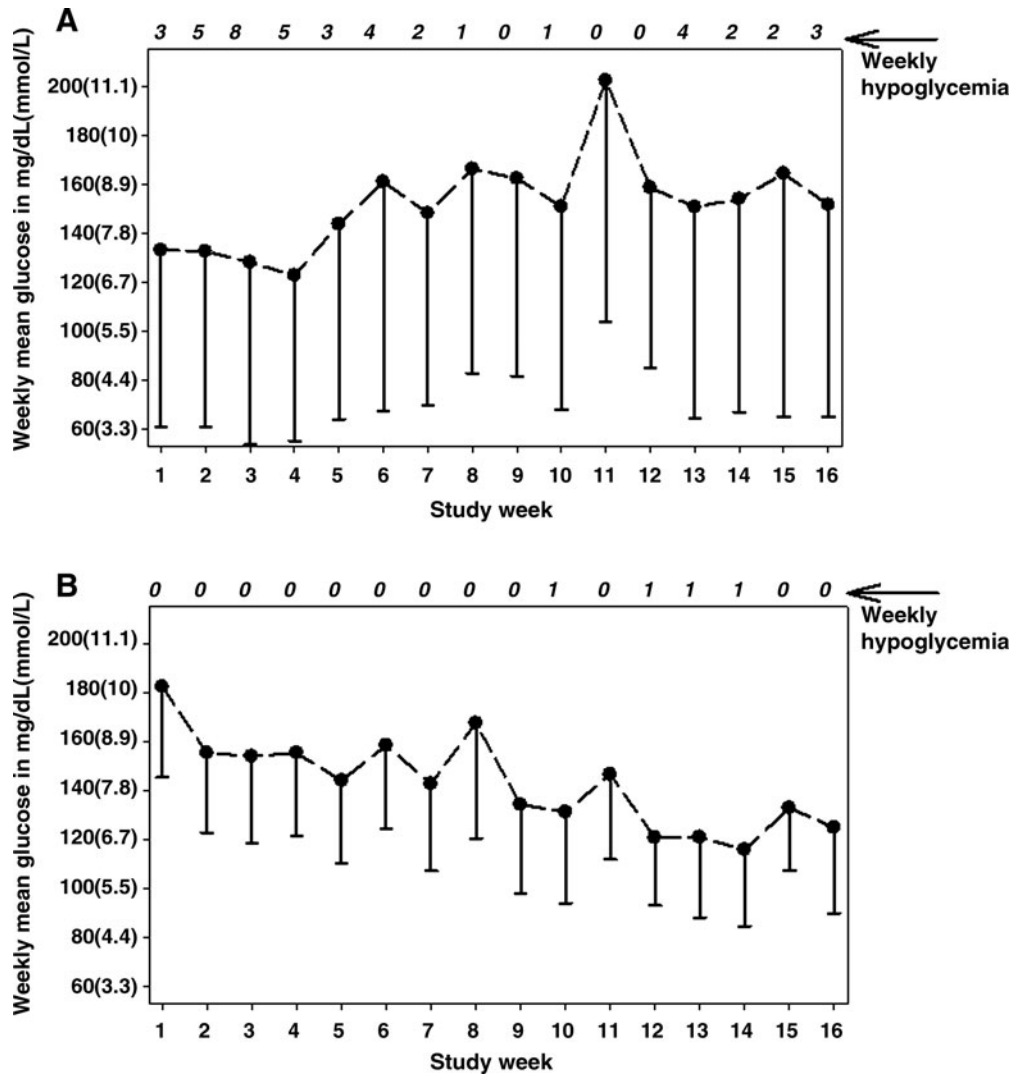

**SUPPLEMENTARY FIG. S1.** Examples of two patients with different glycemic profiles. The numbers at the top of each panel represent the number of minor hypoglycemic episodes per week. The regression line was not plotted because of the limited data points. (A) A 49-year-old man with type 1 diabetes in Group I. The frequency of hypoglycemia was high, and thus weekly mean glucose could not have improved. (B) A 57-year-old woman with type 2 diabetes in Group II. Initial weekly mean glucose exceeded the therapy goal, and infrequent hypoglycemia enabled improvement in weekly mean glucose.
